# Supplementary material for: pH sensitive polyelectrolyte complex micelles for highly effective combination chemotherapy
Source: Royal Society of Chemistry journal article supplement (doi:10.1039/c4tb00867g), 2014-07-22
Supplement: c4tb00867g1.pdf [file c4tb00867g1.pdf]

## **pH Sensitive Polyelectrolyte Complex Micelles for Highly Effective Combination Chemotherapy**

Thiruganesh Ramasamy<sup>a†</sup>, Jeong Hwan Kim<sup>a†</sup>, Ju Yeon Choi<sup>a</sup>, Tuan Hiep Tran<sup>a</sup>,

Han-Gon Choi<sup>b</sup>, Chul Soon Yong<sup>a,\*</sup>, Jong Oh Kim<sup>a,\*</sup>

<sup>a</sup>College of Pharmacy, Yeungnam University, 214-1, Dae-dong, Gyeongsan712-749, South Korea

<sup>b</sup>College of Pharmacy, Institute of Pharmaceutical Science and Technology, Hanyang University, 55, Hanyangdaehak-ro, Sangnok-gu, Ansan 426-791, South Korea

<sup>†</sup>Both authors contributed equally.

\*Corresponding author: College of Pharmacy, Yeungnam University, 214-1 Dae-dong, Gyeongsan 712-749, South Korea

E-mail: [jongohkim@yu.ac.kr](mailto:jongohkim@yu.ac.kr) (Jong Oh Kim)

Tel: +82-53-810-2813, Fax: +82-53-810-4654

E-mail: [csyong@ynu.ac.kr](mailto:csyong@ynu.ac.kr) (Chul Soon Yong)

Tel: +82-53-810-2812, Fax: +82-53-810-4654

## Methods

### Physical characterization

The FT-IR spectrum was recorded using a Thermo Scientific Nicolet Nexus 670 FT-IR Spectrometer and Smart iTR with a diamond window (Thermo Fisher Scientific Inc., Waltham, MA). The crystallinity index of samples was obtained using an X-ray diffractometer (X'Pert PRO MPD diffractometer, Almelo, the Netherlands) with a copper anode (Cu K $\alpha$  radiation) as the source of radiation.

Fluorescence spectrophotometer (Perkin Elmer LS 55, USA) was employed to record the fluorescence spectra of combined free drugs and MTX/DOX-M at an excitation wavelength ( $\lambda_{\text{ex}}$ ) of 480 and 610 nm for DOX and MTX, respectively, and with a bandwidth of 5 nm for excitation and emission.

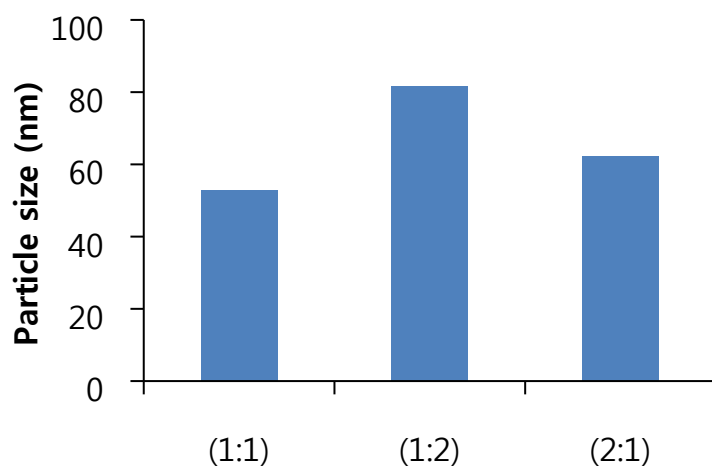

**Figure S1.** Particle size of MTX/DOX-loaded PEC micelles prepared with low molecular weight PEO-*b*-PAA (MW 6700) at R=0.5. Note: at lower feeding ratio (R=0.25), micelles were unstable.

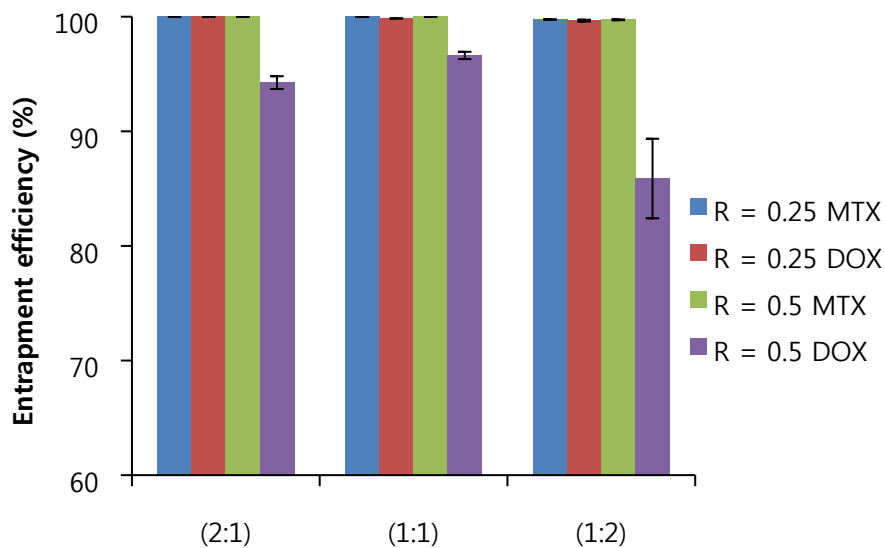

**Figure S2.** Entrapment efficiency of different ratio of MTX and DOX at two charge ratios (R=0.25 and 0.5).

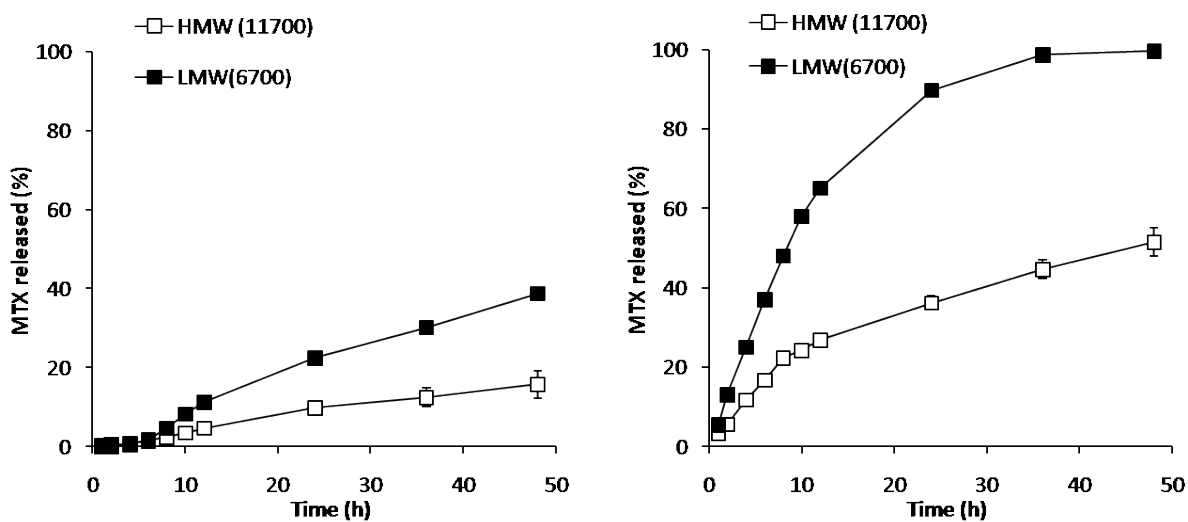

**Figure S3.** Release profiles of MTX-loaded micelles at pH 7.4 and 5.0. The drug-loaded micelles were prepared with PEO-*b*-PAA (MW 6700) at R=0.5.

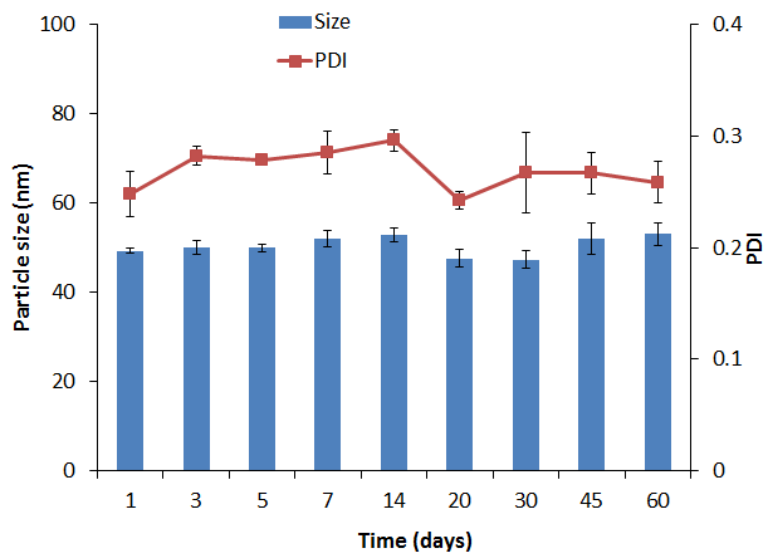

**Figure S4.** Stability analysis of MTX/DOX-M in terms of particle size and PDI at 4°C
